# Supplementary material for: Using an engineered glutamate-gated chloride channel to silence sensory neurons and treat neuropathic pain at the source
Source: PubMed Central journal article supplement (PMC5841150; doi:10.1093/brain/awx201), 2017-08-19
Supplement: awx201_supp_tables_figures.pdf [file awx201_supp_tables_figures.pdf]

**Using an engineered GluCl channel to silence sensory neurons and treat neuropathic pain at the source**

G. A. Weir<sup>1</sup>, S. J. Middleton<sup>1†</sup>, A. J. Clark<sup>1†</sup>, T. Daniel<sup>1</sup>, N. Khovanov<sup>2</sup>, S. B. McMahon<sup>2</sup>  
and D. L. Bennett<sup>1\*</sup>

**Supplemental information**

|                                        | <b>GFP</b>      | <b>β-only</b>  | <b>αβ</b>      |
|----------------------------------------|-----------------|----------------|----------------|
| <b>Membrane conductance (nS)</b>       | 6.25 ± 1.04     | 5.81 ± 0.87    | 5.39 ± 0.49    |
| <b>Resting membrane potential (mV)</b> | -60.25 ± 1.62   | -60.6 ± 1.91   | -60.15 ± 1.43  |
| <b>Rheobase (pA)</b>                   | 403.54 ± 105.76 | 330.32 ± 59.96 | 387.21 ± 73.16 |
| <b>Capacitance (pF)</b>                | 35.15 ± 3.74    | 34.71 ± 3.68   | 33.29 ± 4.68   |
| <b>Number of cells</b>                 | 20              | 26             | 48             |

**Supplementary Table 1. Biophysical and evoked firing properties of untreated DRG neurons expressing GFP, GluClβ or GluClαβ.** No statistical difference was observed for any measured parameter. One-way ANOVA comparing group vs control (GFP), followed by post-hoc Bonferroni test

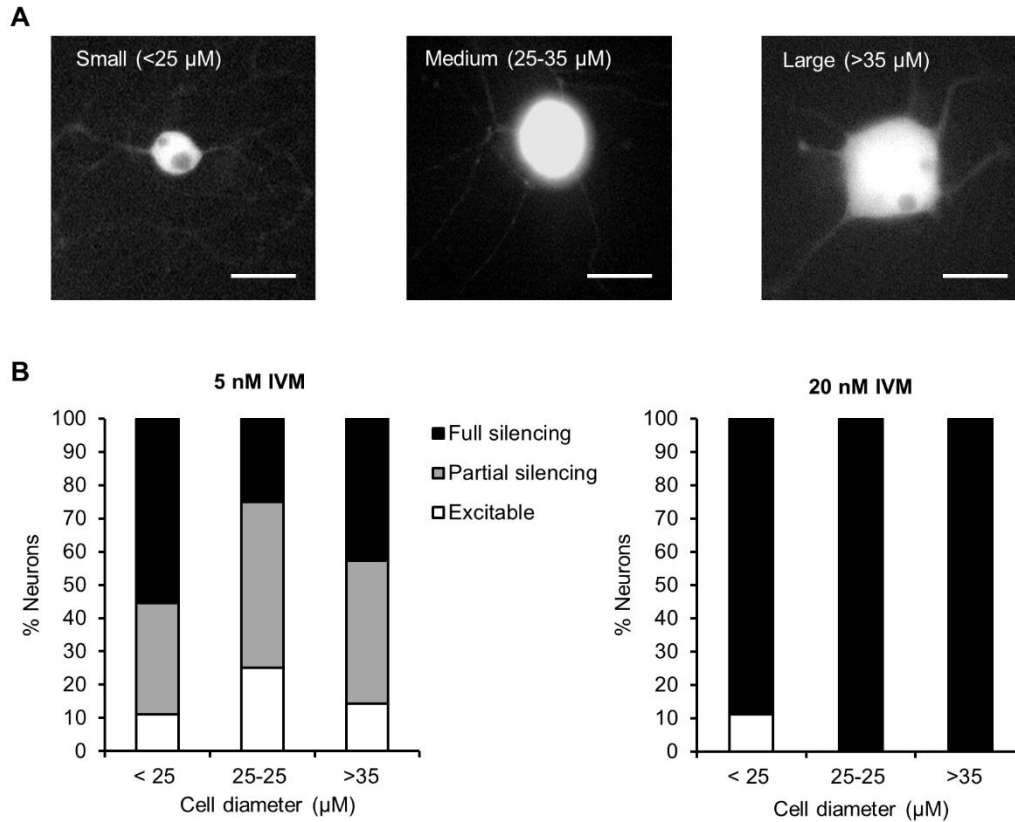

**Supplementary Figure 1. GluCl silencing is effective in DRG of all sizes.** (A) Representative fluorescent images of small, medium and large diameter GluCl<sup>+</sup> DRG neurons. Scale bar represents 25 μm. (B) Silencing efficacy of GluCl activation stratified by cell size with data derived from Fig 1F. Neuronal excitability was defined by the fold-increase in rheobase comparing pre- and post-IVM values: <3 (*excitable*), 3-10 (*partial silencing*) or >10-fold (*full silencing*). 5 nM IVM, *n* = 9 small, 8 medium and 7 large cells. 20 nM IVM, *n* = 9 small, 8 medium and 6 large cells.

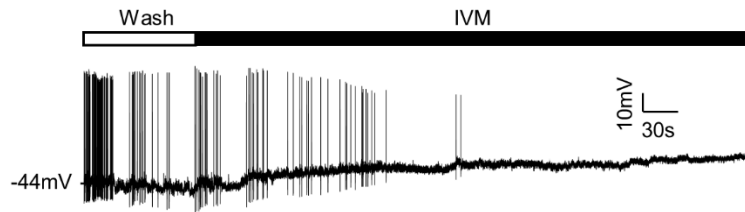

**Supplementary Figure 2. GluCl silencing is effective under conditions of high  $[Cl^-]_i$ .** Patch clamp recording of spontaneous activity of a  $GluCl^+$  DRG while 20nM IVM is applied. Patch pipette was filled with an intracellular solution containing 80mM  $Cl^-$ . Under these recording conditions GluCl activation depolarizes the membrane potential, yet is still effective at reducing firing.

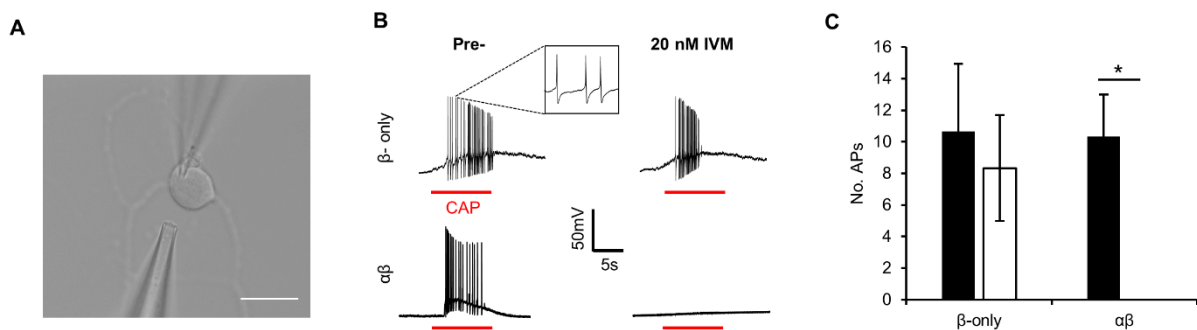

**Supplementary Figure 3. GluCl activation prevents action potential firing in response to capsaicin.** (A) Bright field image of experimental setup. Small diameter (15-25 $\mu$ M) neurons expressing GluCl were assessed for action potential firing during a 10s application of 1 $\mu$ M capsaicin (CAP) applied locally by a second pipette positioned adjacent to the cell. Scale bar represents 25 $\mu$ M. (B) Representative firing of  $GluCl^+$  neurons in response to CAP, before and 15 mins after treatment with 20 nM IVM. (C) Quantification of action potentials fired in

response to CAP pre- and 15 mins following 20 nM IVM.  $*P < 0.01$ , Student's paired *t*-test comparing pre- and post-IVM responses ( $n = 6$  for both groups). Data represents mean  $\pm$  s.e.m.

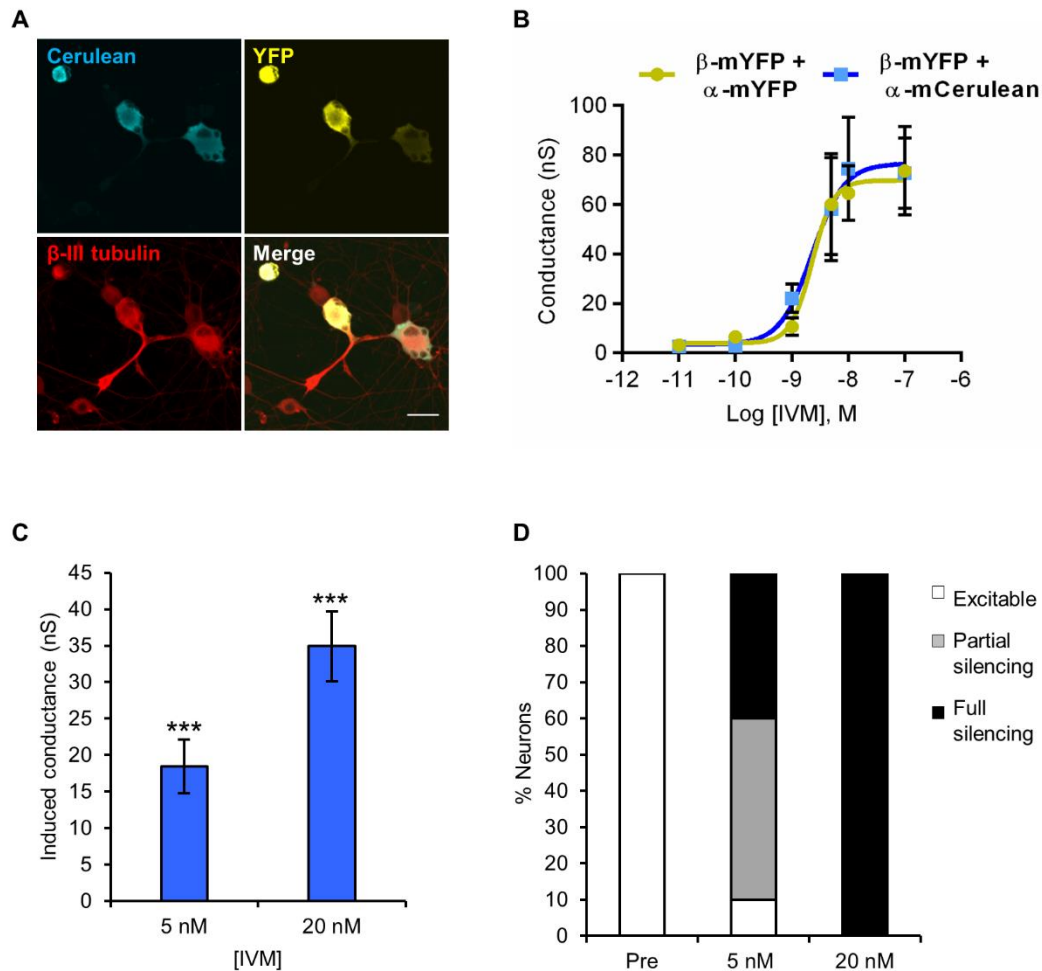

**Supplementary Figure 4. Replacing YFP with Cerulean does not alter function of GluCl $\alpha$ .**

(A) Endogenous cerulean and YFP signal in addition to immunostained  $\beta$ -III tubulin of DRG neurons electroporated with GluCl $\alpha$ -mCerulean and GluCl $\beta$ -mYFP. Scale bar, 30  $\mu$ m. (B) Dose-response relation for IVM activation of GluCl expressed in HEK 293 cells. EC<sub>50</sub> is  $2.6 \pm 0.2$  nM for  $\beta$ -mYFP +  $\alpha$ -mYFP and  $2 \pm 0.3$  nM for  $\beta$ -mYFP +  $\alpha$ -mCerulean expressing cells ( $P > 0.99$ , Student's unpaired *t*-test). Each data point represents the mean  $\pm$  s.e.m. of the input conductance of at least 5 cells at each IVM concentration. (C) Membrane conductance induced

by acute treatment of GluCl<sup>+</sup> DRG with 5 and 20 nM IVM. \*\*\* $P < 0.001$ , Student's paired  $t$ -test comparing pre- and post-IVM levels (5 nM  $n = 10$  cells, 20 nM  $n = 6$  cells.) Data represents mean  $\pm$  s.e.m. **(D)** Excitability status before and after IVM treatment. 5 nM  $n = 10$  cells, 20 nM  $n = 6$  cells.

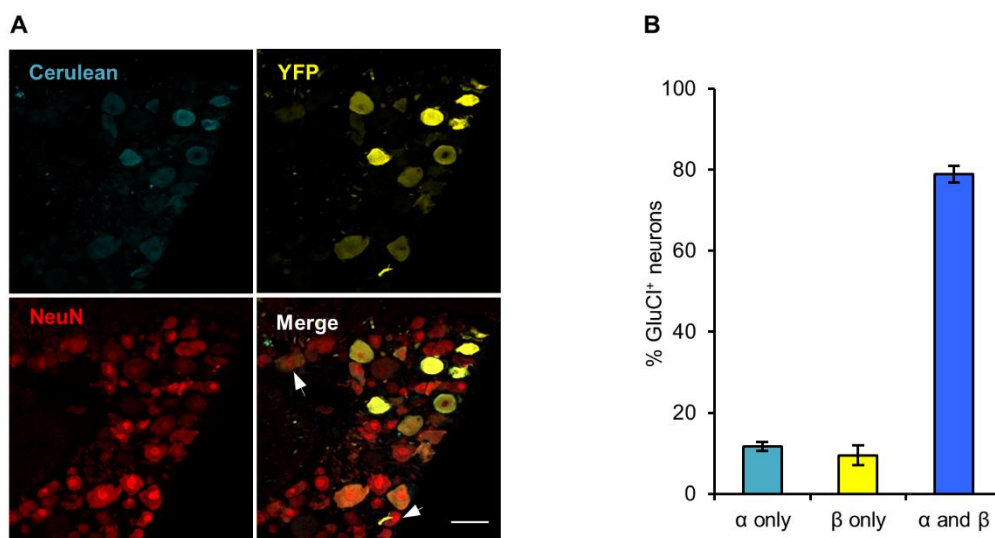

**Supplementary Figure 5. GluCl $\alpha$  and  $\beta$  subunits co-localize following i.t. delivery.** (A) L4 DRG 4-weeks post-AAV delivery imaged for native cerulean/YFP fluorescence and immunostained NeuN. White arrows mark neurons only expressing a single subunit. Scale, 50  $\mu$ m. (B) Quantification of co-expression. Data represents the mean  $\pm$  s.e.m from three animals (total= 323 cells).

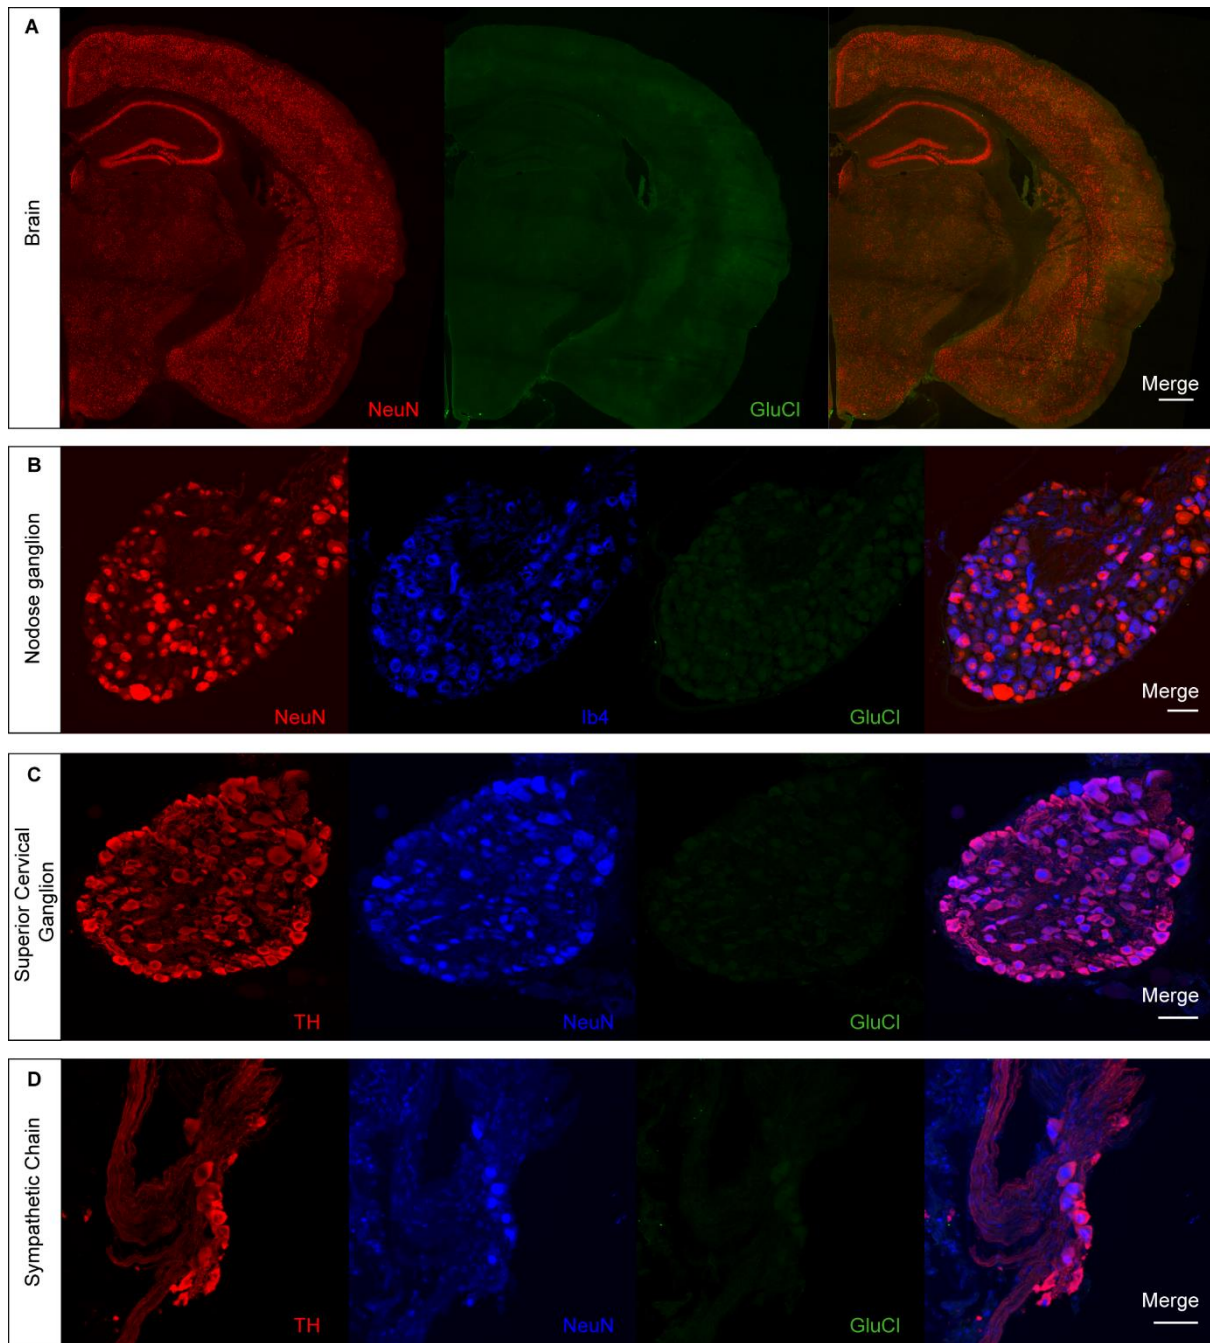

**Supplementary Figure 6. GluCl expression is absent in brain and autonomic structures following i.t. AAV delivery.** Whole brains and a range of ganglia were assessed from GluCl<sup>+</sup> animals following i.t. delivery of AAV-GluCl ( $n = 3$ ). No GluCl expression was observed in (A) brain (scale bar 500µm), (B) nodose ganglia, (C) Superior cervical ganglion, or (D) lumbar sympathetic chain neurons. Scale bar represents 50µm unless stated otherwise. *TH*-tyrosine hydroxylase.

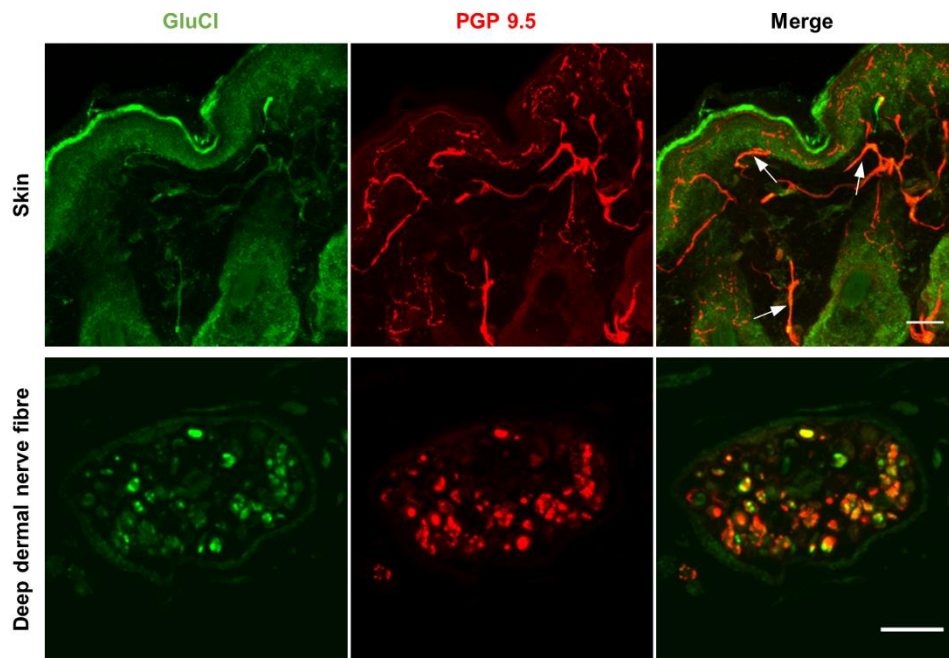

**Supplementary Figure 7. GluCl<sup>+</sup> afferents in skin.** Hind paw skin taken from GluCl AAV animals four weeks post AAV delivery. Representative images ( $n = 3$  GluCl<sup>+</sup> animals) showing immunostaining for YFP (*green*) and PGP 9.5 (*red*) in the skin and a transverse section of a deep dermal nerve fibre. Scale bar, 20  $\mu$ m.

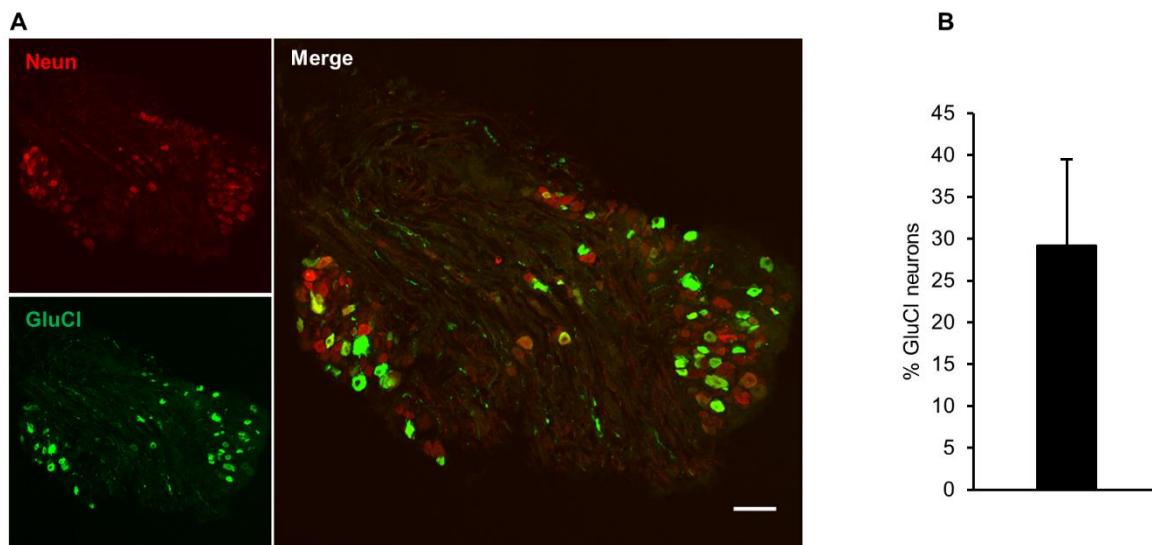



**Supplementary Figure 8. Long-term expression of GluCl after a single i.t. dose of GluCl $\alpha\beta$ -AAV.** Anatomical analysis of DRG taken from animals 7 months post i.t. delivery. **(A)** L4 DRG immunostained for NeuN (*red*) and YFP (*green*). Scale bar, 100  $\mu$ m. **(B)** Total neurons that are GluCl<sup>+</sup>. Data represents mean  $\pm$  s.e.m of four animals (with one animal from the cohort excluded for zero GluCl expression) and a total of 1762 cells.

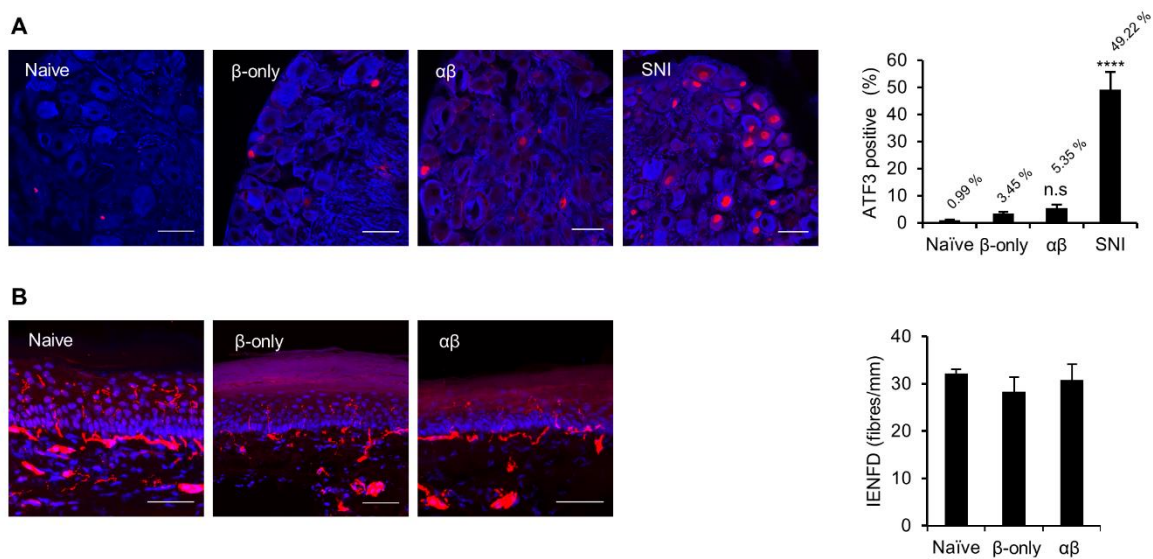

**Supplementary Figure 9. DRG ATF-3 expression and cutaneous afferent innervation in aged GluCl-AAV animals.** Tissue derived from animals 7-months following i.t. delivery of GluCl-AAV. Naïve group represents age matched animals that did not undergo i.t. surgery and SNI group represents animals 4-weeks post SNI as a positive control for nerve injury. **(A)** *Left*, Representative images of  $\beta$ -III tubulin (*blue*) and ATF-3 (*red*) staining of L4 DRG sections. *Right*, Quantification of ATF-3 expression as a percentage of total neurons. \*\*\*\* $P < 0.001$ , one-way ANOVA followed by post-hoc Bonferroni test, data represents mean  $\pm$  s.e.m. Naïve  $n = 3$ ,  $\beta$ -only  $n = 3$ ,  $\alpha\beta$   $n = 4$ , SNI  $n = 4$  animals. **(B)** *Left*, Representative images of DAPI (*blue*) and PGP9.5 (*red*) staining of hind paw glabrous skin of aged cohorts. *Right*, Quantification of intra-epidermal nerve fibre density (IENFD).  $P > 0.05$ , one-way ANOVA



followed by post-hoc Bonferroni test, data represents mean  $\pm$  s.e.m. Naïve  $n = 3$ ,  $\beta$ -only  $n = 3$  and  $\alpha\beta$   $n = 4$  animals. Scale bars represent 50  $\mu$ m.

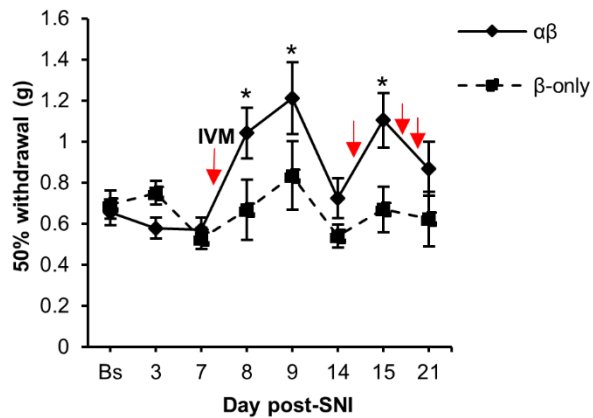

**Supplementary Figure 10. Mechanical thresholds of the contralateral paw of  $\text{GluCl}^+$  animals following SNI.** Time-course of contralateral paw mechanical sensitivity following SNI (related to **Fig 5A**) and dosing with IVM. Red arrows signal the time at which animals received a systemic dose of 5 mg/kg IVM.  $*P < 0.05$ , RM-ANOVA followed by post-hoc Bonferroni test comparing post-SNI time-points with baseline,  $n = 11$  animals per group.
